# Supplementary material for: Low-Level Fluvalinate Treatment in the Larval Stage Induces Impaired Olfactory Associative Behavior of Honey Bee Workers in the Field
Source: MDPI journal article supplement (doi:10.3390/insects13030273), 2022-03-10
Supplement: s1 [file s1]

## (A) Fluvalinate standard

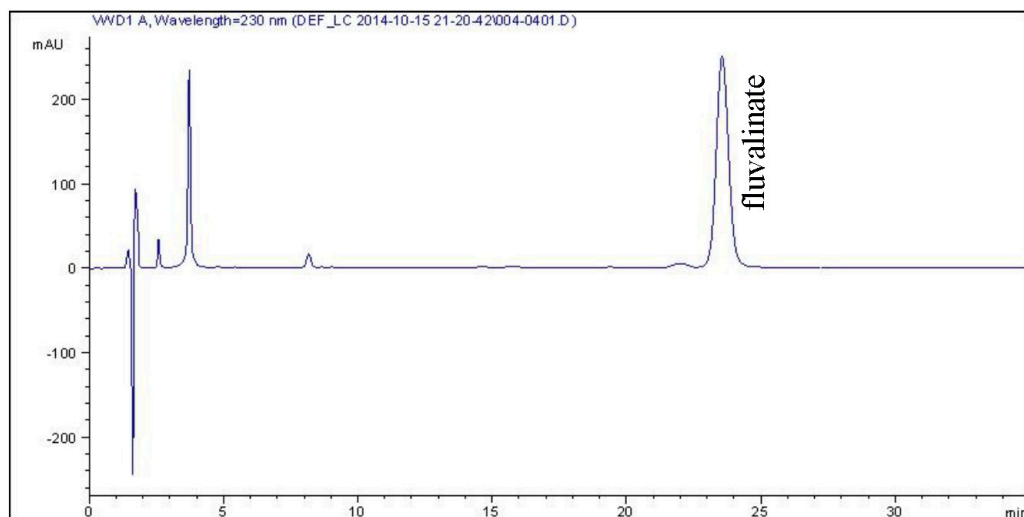

## (B) Purified fluvalinate

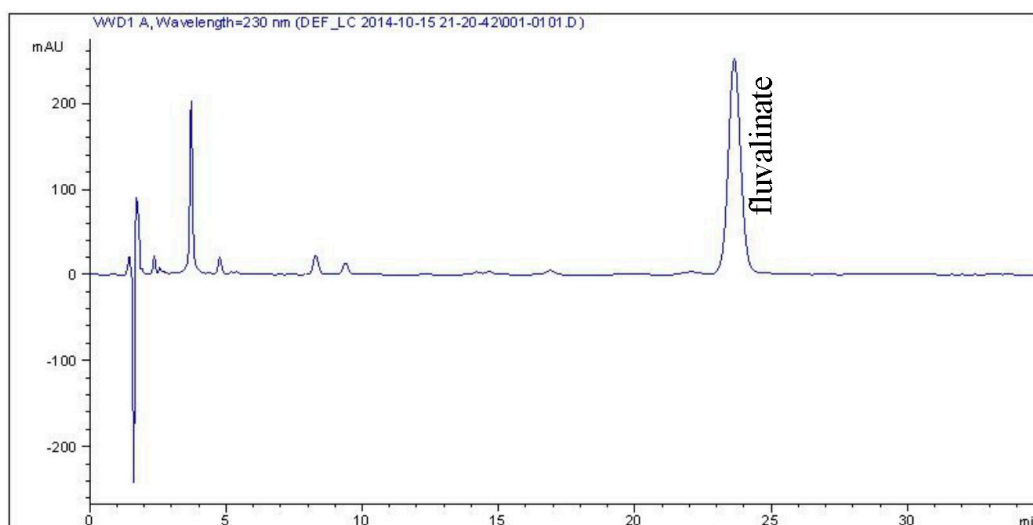

Figure S1. Comparison of high performance liquid chromatography (HPLC) pattern of fluvalinate standard (A) and the purified fluvalinate stock (B) at the concentration of 1 g/L (in 0.1% DMSO). The identical patterns were found in this assay.
